# Supplementary material for: Evolution of the bHLH Genes Involved in Stomatal Development: Implications for the Expansion of Developmental Complexity of Stomata in Land Plants
Source: PubMed Central journal article supplement (PMC3823973; doi:10.1371/journal.pone.0078997), 2013-11-11

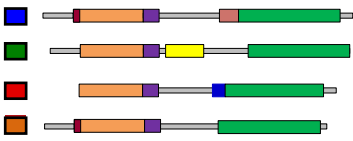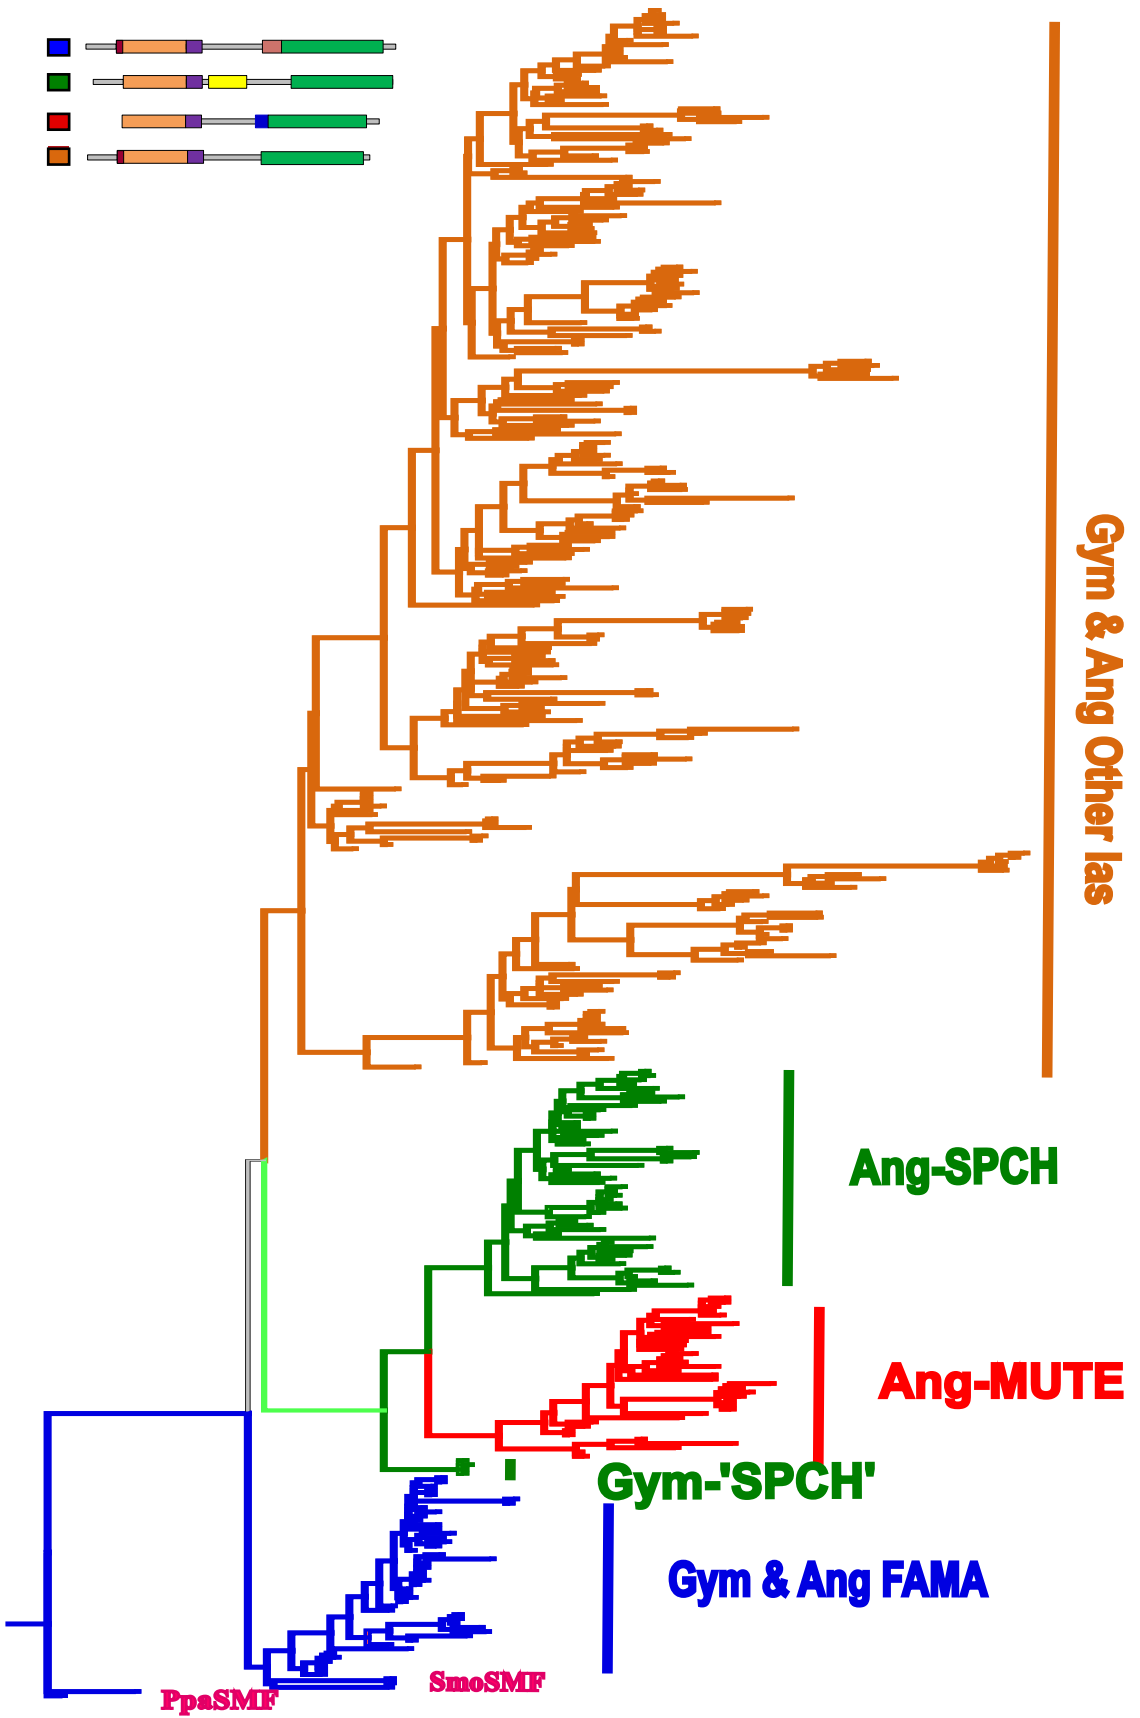

Supplement: pone.0078997.s001.pdf [file pone.0078997.s001.pdf]
